# Supplementary material for: Oral and Intravenous Fumonisin Exposure in Pigs—A Single-Dose Treatment Experiment Evaluating Toxicokinetics and Detoxification
Source: PubMed Central journal article supplement (PMC5923316; doi:10.3390/toxins10040150), 2018-04-05
Supplement: toxins-10-00150-s001.pdf [file toxins-10-00150-s001.pdf]

# 1 Supplementary Materials: Oral and Intravenous 2 Fumonisin Exposure in Pigs – a Single-Dose 3 Treatment Experiment Evaluating Toxicokinetics and 4 Detoxification

5 Hanna Schertz, Jeannette Kluess, Jana Frahm, Dian Schatzmayr, Ilse Dohnal, Gerlinde Bichl,  
6 Heidi Schwartz-Zimmermann, Gerhard Breves and Sven Dänicke

7 **Table S1.** Composition of basal diet.

| <b>Ingredients (g/kg)</b>                               |       |
|---------------------------------------------------------|-------|
| Barley                                                  | 745   |
| Soybean meal                                            | 190   |
| Soybean Oil                                             | 25    |
| HCl-lysine                                              | 5     |
| DL-methionine                                           | 3     |
| L-threonine                                             | 2     |
| L-tryptophan                                            | 1     |
| Mineral and vitamin premix <sup>1</sup>                 | 30    |
| <b>Analysed composition</b>                             |       |
| Dry matter (DM, %)                                      | 90.1  |
| Crude protein (g/kg DM)                                 | 182.7 |
| Crude fat (g/kg DM)                                     | 42.3  |
| Crude fibre (g/kg DM)                                   | 43.5  |
| Crude ash (g/kg DM)                                     | 65.9  |
| Aflatoxin B1, B2, G1, G2 (LOD = 0.2 µg/kg) <sup>2</sup> | <LOD  |
| Fumonisin B1 and B2 (LOD = 20 µg/kg) <sup>2</sup>       | <LOD  |

8 <sup>1</sup>provided per kg premix: crude ash 90 %, Ca 24.5 %, P 6 %, Na 5.5 %, Mg 1 %, Fe 4,000 mg, Cu 1,000  
9 mg, Mn 2,000 mg, Zn 4,000 mg, I 50 mg, Se 15 mg, Co 20 mg, vitamin A 400,000 I.U., vitamin D<sub>3</sub> 40,000  
10 I.U., vitamin E 1,200 mg, vitamin B<sub>1</sub> 37.5 mg, vitamin B<sub>2</sub> 100 mg, vitamin B<sub>6</sub> 100 mg, vitamin B<sub>12</sub> 750  
11 mg, vitamin K<sub>3</sub> 52.5 mg, nicotinic acid 500 mg, pantothenic acid 337.5 mg, choline chloride 5,000 mg.

12 <sup>2</sup>analysed by Romer Labs GmbH.
